# Supplementary material for: Induction Chemotherapy Improved Long Term Outcomes in Stage IV Locoregional Advanced Nasopharyngeal Carcinoma
Source: PubMed Central journal article supplement (PMC7085214; doi:10.7150/ijms.42005), 2020-02-10
Supplement: ijmsv17p0568s1.pdf [file ijmsv17p0568s1.pdf]

**Table S1: Grade 3 or 4 adverse effects in IC + CCRT group**

| Chemotherapy grade 3                           | Chemotherapy grade 4                      | RT grade 3                             |
|------------------------------------------------|-------------------------------------------|----------------------------------------|
| 0                                              | 0                                         | 0                                      |
| 0                                              | 0                                         | Radiation mucositis: Grade 3           |
| 0                                              | 0                                         | 0                                      |
| Acute<br>pancreatitis in first IC              | 0                                         | 0                                      |
| 0                                              | 0                                         | Grade 3 oral mucositis                 |
| Delayed vomiting                               | 0                                         | 0                                      |
| 0                                              | 0                                         | 0                                      |
| 0                                              | 0                                         | 0                                      |
| Gastric ulcers under local Bosmin<br>injection | 0                                         | 0                                      |
| 0                                              | 0                                         | 0                                      |
| 0                                              | 0                                         | 0                                      |
| Delay vomiting                                 | 0                                         | 0                                      |
| 0                                              | Neutropenia and activation<br>of HCV CCRT | Neutropenia and activation of<br>HCV   |
| 0                                              | 0                                         | 0                                      |
| Delay vomiting                                 | 0                                         | 0                                      |
| 0                                              | 0                                         | Oral mucositis: Grade 3 Severe<br>pain |
| Hiccup grade III                               | Coronary artery disease                   | 0                                      |
| Hiccup grade III                               | 0                                         | 0                                      |
| Vomit (Emend used)                             | 0                                         | 0                                      |
| 0                                              | Neutropenic fever                         | 0                                      |
| 0                                              | 0                                         | 0                                      |
| Thrombosis subclavian<br>vein (DVT)            | 0                                         | 0                                      |
| 0                                              | 0                                         | 0                                      |
| Right arm deep vein thrombosis                 | 0                                         | 0                                      |
| 0                                              | 0                                         | 0                                      |
| 0                                              | 0                                         | 0                                      |
| 0                                              | 0                                         | 0                                      |
| 0                                              | 0                                         | 0                                      |
| Neutropenia                                    | 0                                         | Grade 3 skin wet peeling               |
| 0                                              | 0                                         | Paranasal sinusitis                    |

|                                    |   |                                         |
|------------------------------------|---|-----------------------------------------|
| 0                                  | 0 | 0                                       |
| Nausea with vomit                  | 0 | 0                                       |
| 0                                  | 0 | 0                                       |
| Vomit & Emend given                | 0 | 0                                       |
| 0                                  | 0 | 0                                       |
| 0                                  | 0 | Radiation mucositis: grade 3            |
| 0                                  | 0 | 0                                       |
| 0                                  | 0 | 0                                       |
| 0                                  | 0 | 0                                       |
| 0                                  | 0 | Hard to swallowing                      |
| Delayed nausea/vomiting            | 0 | 0                                       |
| 0                                  | 0 | Even more sore throat                   |
| 0                                  | 0 | On NG tube                              |
| 0                                  | 0 | 0                                       |
| Grade 3 delayed<br>nausea/vomiting | 0 | 0                                       |
| 0                                  | 0 | 0                                       |
| Hiccup and constipation            | 0 | 0                                       |
| 0                                  | 0 | 0                                       |
| Hiccup s/p CC                      | 0 | Grade 3 oral mucositis & hiccup         |
| Delayed<br>Nausea/vomiting         | 0 | 0                                       |
| Grade III nausea/vomiting          | 0 | 0                                       |
| Chill after CC                     | 0 | Chill                                   |
| 0                                  | 0 | Husky voice + body weight<br>loss > 20% |
| 0                                  | 0 | 0                                       |
| Port-A infection cellulitis        | 0 | 0                                       |
| WBC down while CC                  | 0 | 0                                       |
| 0                                  | 0 | 0                                       |
| 0                                  | 0 | 0                                       |
| 0                                  | 0 | 0                                       |
| 0                                  | 0 | 0                                       |
| Neutropenic fever                  | 0 | 0                                       |
| Grade III anorexia                 | 0 | 0                                       |
| Severe nausea after CC             | 0 | 0                                       |
| 0                                  | 0 | 0                                       |
| Severe nausea and vomiting         | 0 | Severe nausea and vomiting              |

|                                                                                 |                                 |                                       |
|---------------------------------------------------------------------------------|---------------------------------|---------------------------------------|
| Pancytopenia (ANC:324)                                                          | 0                               | 0                                     |
| 0                                                                               | 0                               | 0                                     |
| 0                                                                               | Sepsis in 3rd IC from<br>Port A | Mucositis: Grade 3                    |
| 0                                                                               | 0                               | 0                                     |
| Acute gastroenteritis, mucositis,<br>pneumonia, Bacteremia,<br>Port-A infection | 0                               | Dermatitis: Grade 3                   |
| Duodenal ulcer                                                                  | Neutropenia, grade IV           | 0                                     |
| 0                                                                               | 0                               | Dermatitis: Grade 3                   |
| Delay vomiting                                                                  | 0                               | Mucositis: Grade 3<br>+ skin reaction |
| Neutropenia                                                                     | 0                               | 0                                     |
| Hypercalcemia                                                                   | Grade 4 neutropenia             | Grade 3 oral mucositis                |
| 0                                                                               | 0                               | 0                                     |
| Leukopenia grade 3 +<br>port-A abscess                                          | 0                               | 0                                     |
| Grade 3 nausea, anorexia on CC                                                  |                                 | Mucositis: Grade 3                    |
| 0                                                                               | 0                               | 0                                     |
| 0                                                                               | 0                               | 0                                     |
| 0                                                                               | 0                               | 0                                     |
| 0                                                                               | 0                               | 0                                     |
| 0                                                                               | 0                               | 0                                     |

---

**Table S2: Grade 3 or 4 adverse effects in CCRT group**

| Chemotherapy Grade 3                           | Chemotherapy grade 4 | RT grade 3                      |
|------------------------------------------------|----------------------|---------------------------------|
| 0                                              | 0                    | Mucositis: Grade 3              |
| 0                                              | 0                    | 0                               |
| 0                                              | 0                    | 0                               |
| Nausea/vomiting grade 3<br>(vomiting 6-10/day) | 0                    | Pharyngeal mucositis: Grade 2~3 |
| 0                                              | 0                    | 0                               |
| 0                                              | 0                    | 0                               |
| 0                                              | 0                    | Mucositis: Grade 3              |
| 0                                              | 0                    | 0                               |
| 0                                              | 0                    | Mucositis: Grade 3              |
| 0                                              | 0                    | Mucositis: Grade 3              |
| 0                                              | 0                    | Dermatitis radiation: Grade 3   |
| 0                                              | 0                    | Mucositis: Grade 3              |
| 0                                              | 0                    | 0                               |
| 0                                              | 0                    | 0                               |
| 0                                              | 0                    | Mucositis: Grade 3              |
| 0                                              | 0                    | 0                               |
| 0                                              | 0                    | Mucositis: Grade 3              |
| 0                                              | 0                    | 0                               |
| 0                                              | 0                    | 0                               |
| 0                                              | 0                    | 0                               |
| Neutropenic fever on CC                        | 0                    | 0                               |
| 0                                              | 0                    | 0                               |
| 0                                              | 0                    | Dermatitis: grade 3             |
| Hypokalemia fever sepsis                       | 0                    | 0                               |
| 0                                              | 0                    | Dermatitis + mucositis: Grade 3 |
| Oral mucositis                                 | 0                    | Oral mucositis                  |
| Grade 3 neutropenia                            | 0                    | Mucositis: Grade 3              |
| 0                                              | 0                    | Mucositis: Grade 3              |
| 0                                              | 0                    | 0                               |
| 0                                              | 0                    | 0                               |
| 0                                              | 0                    | 0                               |
| 0                                              | 0                    | 0                               |
| 0                                              | 0                    | 0                               |
| 0                                              | 0                    | 0                               |
| 0                                              | 0                    | 0                               |

|                                                |   |                                                  |
|------------------------------------------------|---|--------------------------------------------------|
| 0                                              | 0 | 0                                                |
| 0                                              | 0 | 0                                                |
| 0                                              | 0 | 0                                                |
| 0                                              | 0 | 0                                                |
| 0                                              | 0 | 0                                                |
| 0                                              | 0 | 0                                                |
| Weakness                                       | 0 | R/T related oral mucositis                       |
| 0                                              | 0 | Weakness                                         |
| Severe fatigue and nausea                      | 0 | Mucositis Grade 3 + severe<br>fatigue and nausea |
| 0                                              | 0 | Mucositis dermatitis: Grade 3                    |
| 0                                              | 0 | Dermatitis: Grade 3                              |
| 0                                              | 0 | 0                                                |
| 0                                              | 0 | Mucositis: Grade 3                               |
| 0                                              | 0 | Dermatitis + mucositis: Grade 3                  |
| Nausea: Grade 3                                | 0 | Nausea: grade 3                                  |
| Nausea: Grade 3                                | 0 | 0                                                |
| 0                                              | 0 | 0                                                |
| 0                                              | 0 | Dermatitis: grade 3                              |
| Nausea/vomiting grade 3<br>(vomiting 6-10/day) | 0 | 0                                                |
| 0                                              | 0 | 0                                                |
| 0                                              | 0 | 0                                                |
| 0                                              | 0 | 0                                                |
| 0                                              | 0 | 0                                                |
| 0                                              | 0 | 0                                                |
| 0                                              | 0 | 0                                                |
| 0                                              | 0 | 0                                                |
| 0                                              | 0 | 0                                                |
| 0                                              | 0 | 0                                                |
| 0                                              | 0 | 0                                                |
| 0                                              | 0 | 0                                                |
| Neutropenia grade 3                            | 0 | Oral mucositis: Grade 3 Severe pain              |
| 0                                              | 0 | Mucositis Grade 3                                |
| 0                                              | 0 | 0                                                |
| 0                                              | 0 | Dermatitis: Grade 3                              |
| 0                                              | 0 | Dermatitis radiation: Grade 3                    |
| 0                                              | 0 | Dermatitis radiation: Grade 3                    |
| Neutropenia grade 3                            | 0 | Mucositis dermatitis: Grade 3                    |
| 0                                              | 0 | Mucositis + dermatitis grade 3                   |
| Nausea/vomiting neutropenia grade 3            | 0 | 0                                                |
| Neutropenia grade 3                            | 0 | 0                                                |
| 0                                              | 0 | 0                                                |
| 0                                              | 0 | Mucositis + dermatitis grade 3                   |
| 0                                              | 0 | 0                                                |
| 0                                              | 0 | 0                                                |
| 0                                              | 0 | 0                                                |
| 0                                              | 0 | 0                                                |
| 0                                              | 0 | 0                                                |
| 0                                              | 0 | Grade 3 mucositis                                |
| 0                                              | 0 | 0                                                |



|                                                    |       |                  |   |                                          |
|----------------------------------------------------|-------|------------------|---|------------------------------------------|
| Bacteremia                                         | fever | Port-A infection | 0 | Severe mucositis grade 3                 |
|                                                    | 0     |                  | 0 | Aspiration pneumonia + mucositis         |
|                                                    | 0     |                  | 0 | 0                                        |
|                                                    | 0     |                  | 0 | Dermatitis: Grade 3                      |
|                                                    | 0     |                  | 0 | Dermatitis + mucositis: Grade 3          |
|                                                    | 0     |                  | 0 | 0                                        |
| Delayed nausea and vomit                           |       |                  | 0 | Grade 3 Mucositis                        |
|                                                    | 0     |                  | 0 | Radiation mucositis grade 3              |
| Nausea/vomiting grade 3                            |       |                  | 0 | Dermatitis radiation: Grade 3            |
| (vomiting $\geq 6$ /day) ;                         |       |                  | 0 | mucositis grade 3                        |
|                                                    | 0     |                  | 0 | Oral mucositis: grade 3                  |
| Grade 3 neutropenia                                |       |                  | 0 | 0                                        |
|                                                    | 0     |                  | 0 | 0                                        |
|                                                    | 0     |                  | 0 | 0                                        |
|                                                    | 0     |                  | 0 | 0                                        |
| Delayed emesis grade III                           |       |                  | 0 | Mucositis: Grade 3                       |
|                                                    | 0     |                  | 0 | 0                                        |
| Hold Erbitux for grade 3 mucositis                 |       |                  | 0 | Grade 3 mucositis                        |
| Anorexia grade 3 Hypokalemia + neutropenia grade 3 |       |                  | 0 | 0                                        |
|                                                    | 0     |                  | 0 | 0                                        |
|                                                    | 0     |                  | 0 | 0                                        |
| Port-A infection s/p removal                       |       | Hypokalemia      |   | Grade 3 mucositis                        |
|                                                    | 0     |                  | 0 | Mucositis Grade 3                        |
|                                                    | 0     |                  | 0 | 0                                        |
|                                                    | 0     |                  | 0 | 0                                        |
|                                                    | 0     |                  | 0 | 0                                        |
|                                                    | 0     |                  | 0 | 0                                        |
|                                                    | 0     |                  | 0 | 0                                        |
|                                                    | 0     |                  | 0 | 0                                        |
|                                                    | 0     |                  | 0 | Mucositis: Grade 3 + dermatitis: Grade 3 |
|                                                    | 0     |                  | 0 | Radiation mucositis: grade 3             |
|                                                    | 0     |                  | 0 | 0                                        |
| HB: 8.8 -> 7.7 -> 8.6                              |       |                  | 0 | 0                                        |
| Grade 3 neutropenia                                |       |                  | 0 | 0                                        |
| Grade 3 neutropenia                                |       |                  | 0 | 0                                        |

|                                                 |                       |                                        |
|-------------------------------------------------|-----------------------|----------------------------------------|
| Hyponatremia vomiting<br>with dehydration       | 0                     | 0                                      |
| 0                                               | 0                     | 0                                      |
| 0                                               | 0                     | 0                                      |
| Malaise                                         | 0                     | 0                                      |
| 0                                               | 0                     | 0                                      |
| 0                                               | 0                     | 0                                      |
| 0                                               | 0                     | Mucositis: Grade 3                     |
| 0                                               | 0                     | 0                                      |
| 0                                               | 0                     | 0                                      |
| 0                                               | 0                     | 0                                      |
| Grade 3 neutropenia                             |                       |                                        |
| nausea/vomiting grade 3<br>(vomiting 6-10/days) | 0                     | Mucositis with poor intake             |
| 0                                               | 0                     | Dermatitis : Grade 3                   |
|                                                 | Nausea/vomiting grade | Oral mucositis with<br>dehydration     |
| 0                                               | 4                     |                                        |
|                                                 | (vomiting 10+/day)    | Mucositis: Grade 3                     |
| Delay vomiting                                  | 0                     | Dermatitis + mucositis grade 3         |
| 0                                               | 0                     | Oral mucositis: Grade 3<br>severe pain |
| 0                                               | 0                     | 0                                      |
| 0                                               | 0                     | Oral mucositis grade 3                 |
| 0                                               | 0                     | Cellulitis of anterior<br>upper neck   |
| 0                                               | 0                     | 0                                      |
| 0                                               | 0                     | 0                                      |
| 0                                               | 0                     | 0                                      |

---



**Table S3: PF dose in IC+CCRT group patient**

| P cycles | P dose sum<br>(mg/m <sup>2</sup> ) | F cycles | F dose sum<br>(mg/m <sup>2</sup> ) |
|----------|------------------------------------|----------|------------------------------------|
| 3        | 180                                | 3        | 9600                               |
| 3        | 180                                | 3        | 6000                               |
| 3        | 180                                | 3        | 6000                               |
| 3        | 180                                | 3        | 9600                               |
| 3        | 180                                | 3        | 9000                               |
| 3        | 180                                | 3        | 6000                               |
| 3        | 180                                | 3        | 6000                               |
| 3        | 150                                | 3        | 9600                               |
| 2        | 120                                | 2        | 2000                               |
| 3        | 180                                | 3        | 8000                               |
| 2        | 120                                | 3        | 5000                               |
| 2        | 120                                | 2        | 4000                               |
| 2        | 120                                | 2        | 6400                               |
| 4        | 320                                | 4        | 16000                              |
| 3        | 180                                | 3        | 6720                               |
| 2        | 180                                | 3        | 9600                               |
| 3        | 150                                | 3        | 6000                               |
| 3        | 180                                | 3        | 9600                               |
| 3        | 180                                | 1        | 2000                               |
| 4        | 240                                | 4        | 12800                              |
| 3        | 180                                | 3        | 7200                               |
| 3        | 180                                | 3        | 7200                               |
| 3        | 180                                | 3        | 6000                               |
| 3        | 180                                | 3        | 9200                               |
| 3        | 180                                | 3        | 9000                               |
| 3        | 220                                | 3        | 3000                               |
| 2        | 120                                | 2        | 2000                               |
| 3        | 180                                | 3        | 2500                               |
| 2        | 120                                | 0        | 0                                  |
| 3        | 180                                | 0        | 0                                  |
| 0        | 0                                  | 3        | 7200                               |
| 2        | 100                                | 2        | 3200                               |
| 2        | 70                                 | 2        | 3450                               |
| 3        | 180                                | 3        | 3000                               |
| 4        | 200                                | 4        | 12000                              |

|   |     |   |       |
|---|-----|---|-------|
| 3 | 180 | 3 | 9600  |
| 2 | 100 | 2 | 4000  |
| 3 | 140 | 2 | 4800  |
| 3 | 180 | 3 | 6000  |
| 3 | 180 | 3 | 9600  |
| 3 | 180 | 3 | 9600  |
| 3 | 180 | 3 | 9600  |
| 3 | 180 | 3 | 9000  |
| 3 | 180 | 3 | 9600  |
| 3 | 180 | 3 | 9600  |
| 5 | 250 | 5 | 10000 |
| 3 | 180 | 3 | 9600  |
| 4 | 240 | 4 | 12800 |
| 2 | 120 | 2 | 6400  |
| 2 | 100 | 2 | 6000  |
| 4 | 240 | 4 | 12800 |
| 4 | 240 | 4 | 16000 |
| 2 | 120 | 2 | 8000  |
| 3 | 180 | 3 | 9600  |
| 3 | 180 | 3 | 9600  |
| 3 | 180 | 3 | 9600  |
| 3 | 180 | 3 | 9600  |
| 3 | 180 | 3 | 9600  |
| 3 | 180 | 3 | 11200 |
| 3 | 208 | 3 | 8000  |
| 3 | 180 | 3 | 9600  |
| 2 | 120 | 2 | 8000  |
| 4 | 240 | 4 | 12000 |
| 3 | 220 | 3 | 5200  |
| 3 | 180 | 3 | 9603  |
| 4 | 240 | 4 | 16000 |
| 3 | 240 | 3 | 6000  |
| 4 | 230 | 3 | 9600  |
| 2 | 120 | 2 | 8000  |
| 3 | 160 | 3 | 3000  |
| 3 | 180 | 3 | 4000  |
| 3 | 180 | 2 | 6400  |
| 3 | 240 | 3 | 9000  |

|                                                                        |                                                            |                                       |                                                             |
|------------------------------------------------------------------------|------------------------------------------------------------|---------------------------------------|-------------------------------------------------------------|
| 3                                                                      | 210                                                        | 3                                     | 2250                                                        |
| One patient took<br>only oral Tegafur for two<br>weeks before his CCRT |                                                            |                                       |                                                             |
| Mean of P cycle<br>number: 2.91                                        | Mean of<br>cumulated<br>P dose: 175.2<br>mg/m <sup>2</sup> | Mean of F<br>cycle<br>number:<br>2.83 | Mean of<br>cumulated<br>F dose:<br>7617.9 mg/m <sup>2</sup> |
|                                                                        | Mean of P dose<br>per cycle:<br>60.3 mg/m <sup>2</sup>     |                                       | Mean of F dose<br>per cycle:<br>2688.7 mg/m <sup>2</sup>    |

---
